# Supplementary material for: Alternatively Spliced Homologous Exons Have Ancient Origins and Are Highly Expressed at the Protein Level
Source: PubMed Central journal article supplement (PMC4465641; doi:10.1371/journal.pcbi.1004325), 2015-06-10
Supplement: pcbi.1004325.s003.pdf [file pcbi.1004325.s003.pdf]

| Events              | PeptideAtlas | Ezkurdia   | Geiger     | Nagaraj    | Muñoz      | NIST       | Kim        | Wilhelm    | Eight      |
|---------------------|--------------|------------|------------|------------|------------|------------|------------|------------|------------|
| <b>N-terminal</b>   | 18           | 14         | 14         | 11         | 11         | 16         | 23         | 17         | 24         |
| <b>HES</b>          | 38           | 33         | 16         | 11         | 17         | 42         | 43         | 30         | 58         |
| <b>C-terminal</b>   | 37           | 16         | 18         | 24         | 20         | 30         | 30         | 17         | 46         |
| <b>Indel</b>        | 76           | 67         | 35         | 35         | 42         | 59         | 73         | 41         | 107        |
| <b>NAGNAG</b>       | 31           | 21         | 17         | 24         | 14         | 13         | 20         | 16         | 38         |
| <b>Substitution</b> | 1            | 0          | 1          | 0          | 0          | 0          | 0          | 0          | 2          |
| <b>Two Proteins</b> | 7            | 3          | 3          | 4          | 1          | 6          | 3          | 4          | 5          |
| <b>Totals</b>       | <b>208</b>   | <b>154</b> | <b>104</b> | <b>109</b> | <b>105</b> | <b>166</b> | <b>192</b> | <b>125</b> | <b>280</b> |

**Table S2. Types of splicing events found in each experiment**

The number of each type of splice event detected in each of the eight peptide data sets. The types of splicing events are described in the main paper. Splice events could be identified in the individual data sets with just a single peptide for each side of the event.
