# Supplementary material for: Alternatively Spliced Homologous Exons Have Ancient Origins and Are Highly Expressed at the Protein Level
Source: PubMed Central journal article supplement (PMC4465641; doi:10.1371/journal.pcbi.1004325), 2015-06-10
Supplement: pcbi.1004325.s004.pdf [file pcbi.1004325.s004.pdf]

A

```

UGT1A10    MARAGWTSVPV-LCVCLLLTCG---FA--EAGKLLVVPMDGSHWFTMQSVVEKLILRGHE
UGT1A9     MACTGWTSPLP-LCVCLLLTCG---FA--EAGKLLVVPMDGSHWFTMRSVVEKLILRGHE
UGT1A7     MARTGWTSPIP-LCVSLLLTCG---FA--EAGKLLVVPMDGSHWFTMQSVVEKLILRGHE
UGT1A6     MAC--LLRSFQRISAGVFFLAL---WGMVVGDKLLVVPQDGSHWLSMKDIVEVLSDRGHE
UGT1A4     MAR-GLQVPLPRLATGLLLLLSVQPWA--ESGKVLVVPIDGSPWLSMREALRELHARGHQ
UGT1A3     MAT-GLQVPLPWLATGLLLLLSVQPWA--ESGKVLVVPIDGSHWLSMREVLRELHARGHQ
UGT1A8     MAV-ESQGGRP-LVLGLLLCVLGPVVS--HAGKILLIPVDGSHWLSMLGAIQQLOQRGHE
UGT1A1     MARTGWTSPIP-LCVSLLLTCG---FA--EAGKLLVVPMDGSHWFTMQSVVEKLILRGHE

UGT1A10    VVVVMPEVSWQLERSLNCTVKTYSTSYTLEDQNREFMVFAHAQWKAQ-AQSIFSLLMSSS
UGT1A9     VVVVMPEVSWQLGRSLNCTVKTYSTSYTLEDLDREFKAFAHAQWKAQ-VRSIYSLLMGSY
UGT1A7     VVVVMPEVSWQLGRSLNCTVKTYSTSYTLEDQDREFMVFADARWTAP-LRSAFSLLTSSS
UGT1A6     IVVVVPEVNLLLKESKYTRKIYPVPYDQEELKNRYQSFQNNHFAERSFLTAPQTEYRNN
UGT1A4     AVVLTPEVNMHIKEEKFFTLTAYAVPWTQKEFDRVTLGYTQGGFFETEHLKRYSRMAIM
UGT1A3     AVVLTPEVNMHIKEENFFTLTTYAISWTQDEFDRHVLGHTQLYFETEHLKFFRSMAML
UGT1A8     IVVLAPDASLYIRDGAFYTLKTYPVPFQREDVKESEFVSLGHNVFENDSFLQRVIKTYKKI
UGT1A1     VVVVMPEVSWQLGKSLNCTVKTYSTSYTLEDLDREFMDFADAQWKAQ-VRSLFSLFLSSS
  
```

B

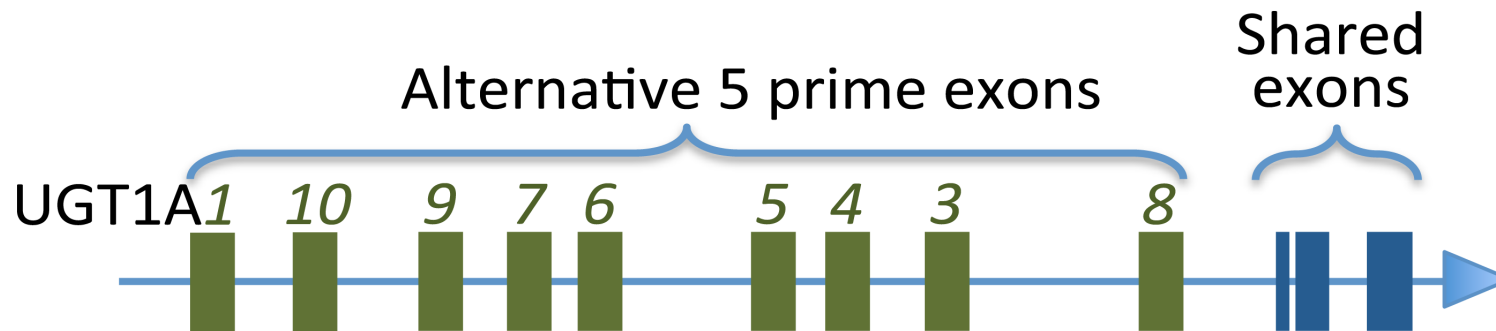

**Figure S1. Splice event specific peptides for the UGT1A cluster**

A. Multiple alignment of the N-terminal region of seven of the isoforms of the UGT1A cluster that were identified in the analysis. The peptides we detected in the eight data sets are mapped onto the alignment in colour. Although all peptides discriminate between some isoforms (even though they do not fall in the splice junction) red peptides discriminate between all splice isoforms, blue peptides only discriminate some of the isoforms. B. The UGT1A cluster exons.
