# Supplementary material for: Alternatively Spliced Homologous Exons Have Ancient Origins and Are Highly Expressed at the Protein Level
Source: PubMed Central journal article supplement (PMC4465641; doi:10.1371/journal.pcbi.1004325), 2015-06-10
Supplement: pcbi.1004325.s005.pdf [file pcbi.1004325.s005.pdf]

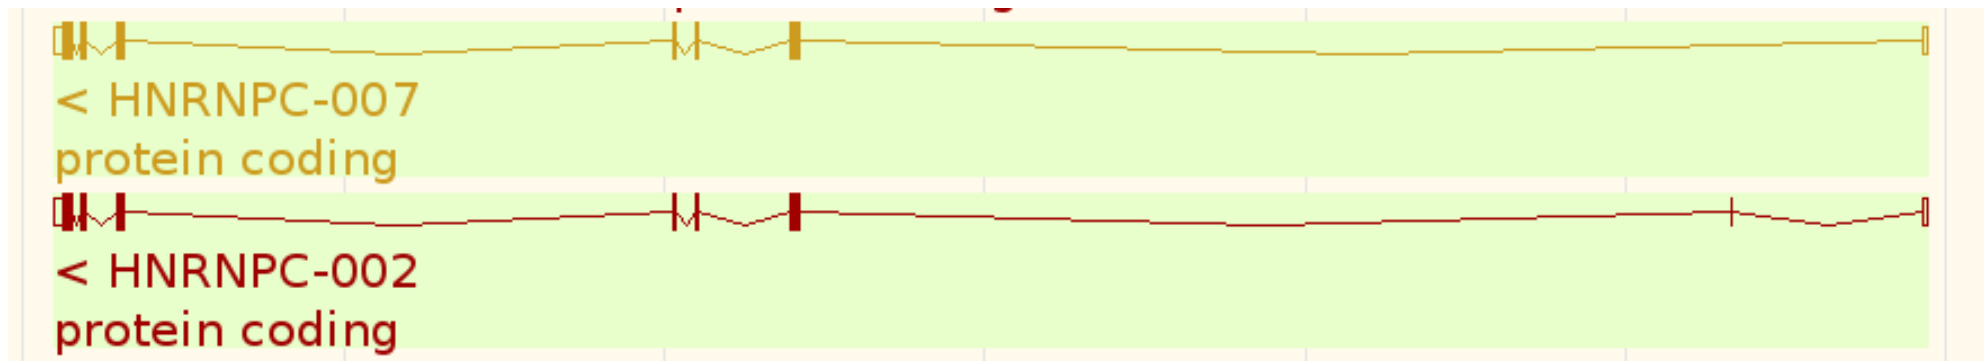

**Figure S2. The indel detected for gene *HNRNPC*.**

A portion of the gene model of HNRNPC from the Ensembl web page. The two isoforms 002 and 007 differ by the insertion/deletion of 13 amino acid residues at the N-terminal (5' end) of the protein. Here the second exon is missing in variant 007.
