# Supplementary material for: Alternatively Spliced Homologous Exons Have Ancient Origins and Are Highly Expressed at the Protein Level
Source: PubMed Central journal article supplement (PMC4465641; doi:10.1371/journal.pcbi.1004325), 2015-06-10
Supplement: pcbi.1004325.s008.pdf [file pcbi.1004325.s008.pdf]

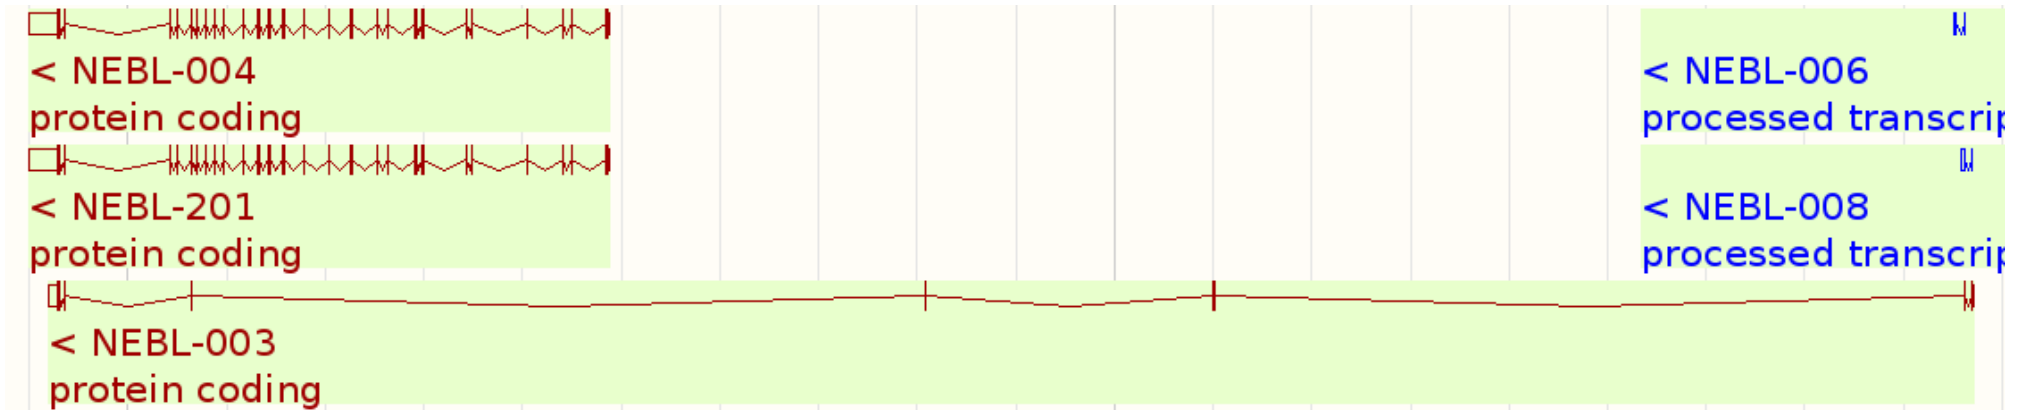

**Figure S5. N-terminal substitution for *NEBL*.**

A section of the *NEBL* gene model from the Ensembl web pages showing the two most important isoforms, nebullette (004) and LIM-nebullette (003). Most of the 5' exons of nebullette are replaced by just four exons in LIM-nebullette, though LIM-nebullette does add a LIM domain.
