# Supplementary material for: Alternatively Spliced Homologous Exons Have Ancient Origins and Are Highly Expressed at the Protein Level
Source: PubMed Central journal article supplement (PMC4465641; doi:10.1371/journal.pcbi.1004325), 2015-06-10
Supplement: pcbi.1004325.s009.pdf [file pcbi.1004325.s009.pdf]

```

ENST00000395392 RNLQOELETQNKQLQRQFSDKRRLEARLQGMVTETTMKWEKECERRVAAKQLEMQNKLWV
ENST00000352331 RNLQOELETQNKQLQRQFSDKRRLEARLQGMVTETTMKWEKECERRVAAKQLEMQNKLWV

ENST00000395392 KDEKCLKQLKAIVTEPKTEKPERPSRERDREKVTQRSVSPSPVPLSSNYIAQISNGQQLMS
ENST00000352331 KDEKCLKQLKAIVTEPKTEKPERPSRERDREKVTQRSVSPSPVP-----

ENST00000395392 QPQLHRRSNSCSSISVASCISEWEQKIPTYNTPLKVTSIARRRQQEPGQSKTCIVSDRRR
ENST00000352331 -----

ENST00000395392 GMYWTEGREVVPTFRNEIEIEEDHCG-----RNAPP IRLRHRRSRSAGDRWVDHKPAS
ENST00000352331 -----LLFQPDQNAPP IRLRHRRSRSAGDRWVDHKPAS

ENST00000395392 NMQTETVMQPHVPHAITVSVANEKALAKCEKYMLTHQELASDGEIETKLIKDIYKTRGG
ENST00000352331 NMQTETVMQPHVPHAITVSVANEKALAKCEKYMLTHQELASDGEIETKLIKDIYKTRGG

```

**Figure S6. *KIF23* Internal substitution.**

A section of the pairwise alignment between two *KIF23* isoforms. The internal exon substitution results in a swap 100 residues for just six residues. There is no homology. These substitutions were very rare in the proteomics experiments.
