# Supplementary material for: Alternatively Spliced Homologous Exons Have Ancient Origins and Are Highly Expressed at the Protein Level
Source: PubMed Central journal article supplement (PMC4465641; doi:10.1371/journal.pcbi.1004325), 2015-06-10
Supplement: pcbi.1004325.s010.pdf [file pcbi.1004325.s010.pdf]

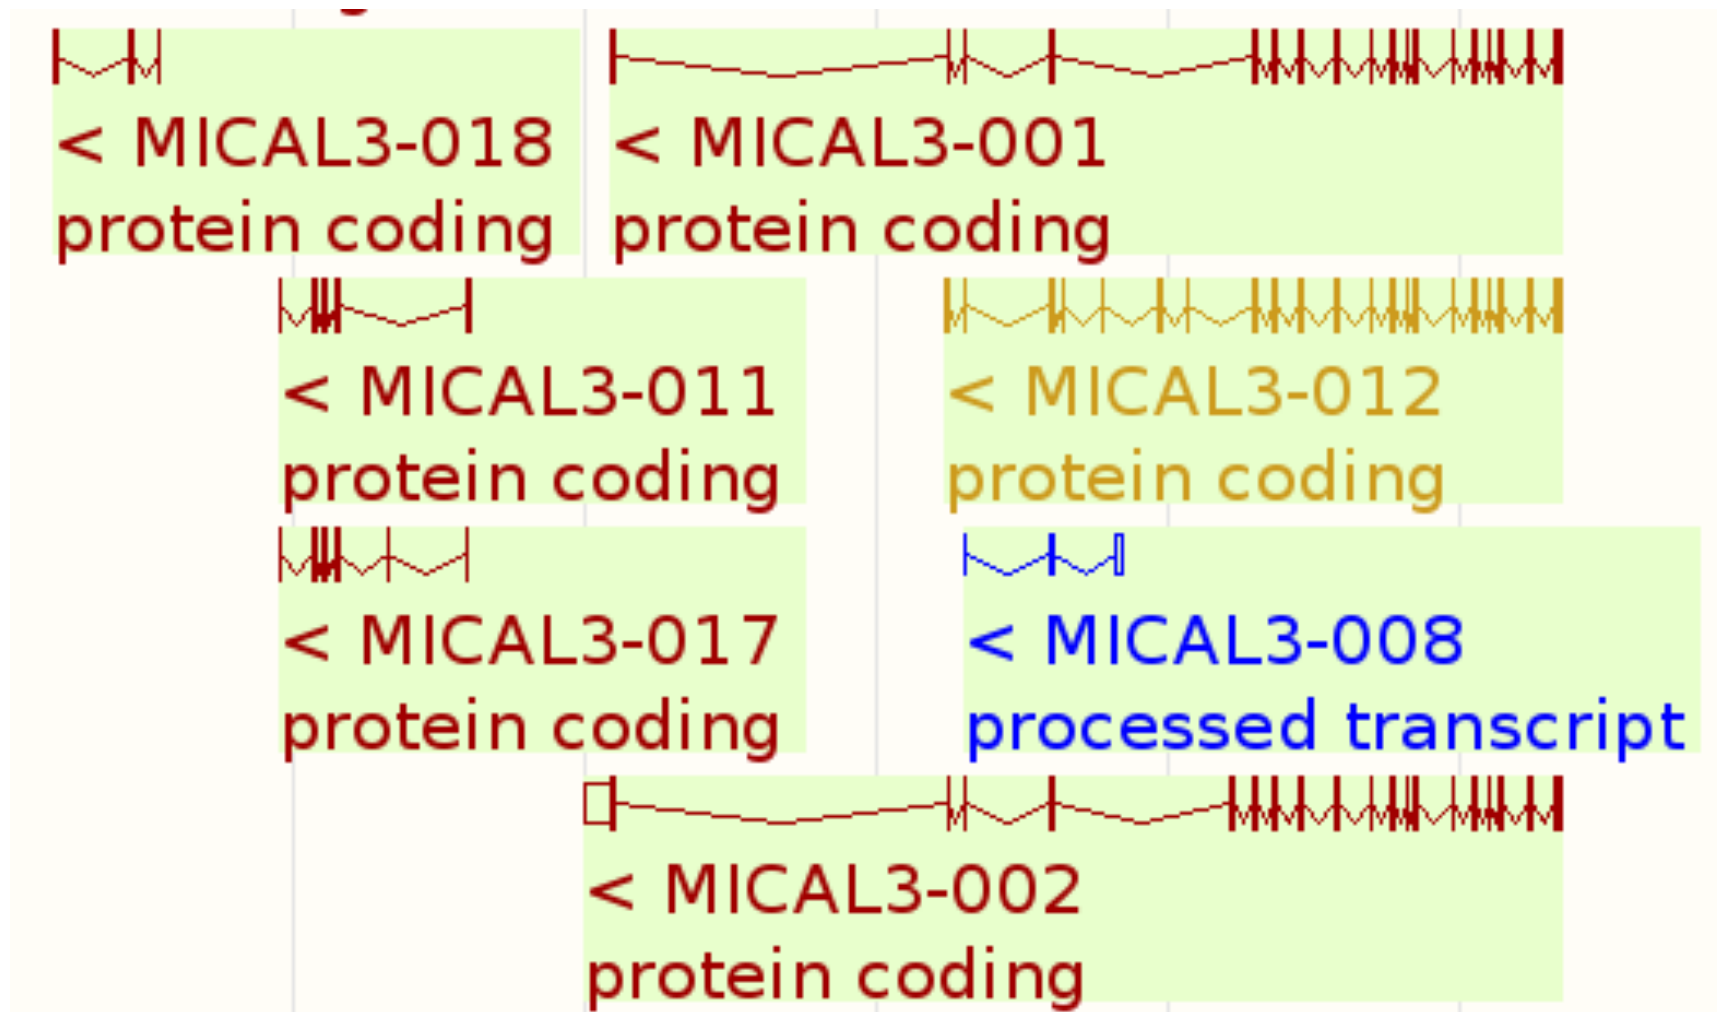

**Figure S7. *MICAL3* gene would give rise to two unique proteins.**

The Ensembl gene model for the *MICAL3* gene. Isoforms 001 and 002 would be translated from one set of overlapping exons while 011 and 017 would be translated from a different set of non-overlapping exons.
