# Supplementary material for: Alternatively Spliced Homologous Exons Have Ancient Origins and Are Highly Expressed at the Protein Level
Source: PubMed Central journal article supplement (PMC4465641; doi:10.1371/journal.pcbi.1004325), 2015-06-10
Supplement: pcbi.1004325.s020.pdf [file pcbi.1004325.s020.pdf]

# A Seed sequence alignment for PF12424

|                        |                                                                        |
|------------------------|------------------------------------------------------------------------|
| Q6UUX1_9CNID/1078-1143 | ARLLWIRGLTRLQHQIRVVNAFRSVID.GRSQRAIASPAV.FNSLLAPVRTA.MVYDSDSQYPSALDSTE |
| B4H868_DROPE/1067-1132 | GQILWIRGLTRLQTQLRVIRAFRSTLEDLNERMSHSLHS.LRSPTGVPV.GGGHPLYNFNLLSPNY     |
| Q7PRK3_ANOGA/1041-1108 | GQILWIRGLTRLQTQLRVVAFRSTLEDLEERRSIHSLHS.LRSSRSHPGGMSTSVTRRLADQIPSSWQ   |
| Q9TYP9_CAEEL/1073-1128 | GQSLWLLGLTRLQTQIRVVKAFQSVNDDSHPNSLTTSTAD.....RLRASYRRLRIARELE          |
| A8PFU1_BRUMA/670-725   | GQMLWLLGLTRLQTQMRVIRAFQTNACTHTPTSLTTSTAE.....RLRASYRRLQLARERE          |
| B7CED8_CAEEL/1099-1165 | GQILWVRGLTRLQTQIRVVKAFQAGLDRREPSLTGQSAAR.LREISRQLRLQ.VDSENRSRSTSRGNIK  |
| Q4TA79_TETNG/1127-1187 | GQILWFRGLNRIQTQ.....MRGGASAVCGGRLSASSPS.LEEAVELLWMW.SIPRAARRSLGALR     |
| Q9N1A0_CANFA/8-74      | GQILWFRGLNRIQTQIDVINTFQTGASFKGVLRKQT.MGQHLDVKHPSSSYVTVAPVTSPPTTSPVA    |
| Q4JQ03_STRPU/1077-1141 | AQILWMRGLTRLQQQIRVVHAFQSGL.QHRIERKSLSNS.VHEFMSPDNTY.DIETTKQDQDAAPMVS   |
| B2CZC1_DANRE/1096-1160 | GQILWFRGLNRIQTQIKVVNAFRSSL.YEGLEKPESSRS.IHNFMSHPEFV.PISEEESRISTIDEGC   |
| Q3L582_HUMAN/119-182   | GQILWFRGLNRIQTQIRVVNAFRSSL.YEGLEKPESSRS.IHNFMTHEFV.RIEDSEPHIPLIDDTD    |
| B055H3_DANRE/1100-1163 | GQILWFRGLNRIQTQIRVVKAFRSSL.YDGIERPESRNS.IHDFQAHPEF.IITDSVHNIPLIDETD    |
| AT2B3_RAT/1147-1201    | LST.....PTHIRVVKAFRSSL.YEGLEKPESSRS.IHNFMTHEFV.LINDYTHNIPLIDDTD        |
| AT2B4_RAT/1089-1150    | GQILWVRGLNRIQTQIRVVVFHFS.RDVIHKSKNQVS.IHSFMTQPEY.AADEMSQ.SFLNQUEE      |
| Q6Q477_MOUSE/1090-1151 | GQILWVRGLNRIQTQIRVVKLFHNN.HEVAHKPKNRSS.IHTFMTQPEY.PADELSQ.SFLDIQE      |
| Q3YB86_PIG/134-197     | GQILWFRGLNRIQTQIKVVKAFHSSL.HESIQKPKNQNS.IHNFMTHEFV.AIDEEGPRTPLEEQE     |
| AT2B4_HUMAN/1126-1188  | GQHLVK.LVPSSSYIKVVKAFHSSL.HESIQKPKNQNS.IHNFMTHEFV.AIEEELPRTPLLEEE      |
| B7Q9C2_IXOSC/971-1038  | GQILWIRGLTRLQTQIRVVNAFRSNLDARNNPAYQTALLR.KASAASPSGTGGFARPOLHSQPSQPOSS  |
| B3N0M2_DROAN/1054-1109 | GQILWIRGLTRLQTQIRVVNAFRQGLDARYGDHNTSLAE.....VLRKQNSMSKRLSETS           |

B

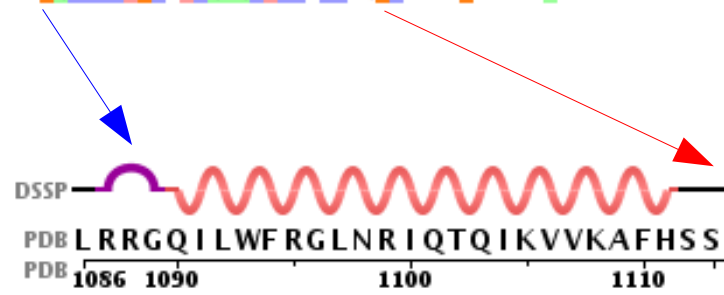

C

|                 |                                       |
|-----------------|---------------------------------------|
| ENST00000357681 | LRRGQILWFRGLNRIQTQIKVVKAFHSSL--HESIQK |
| ENST00000341360 | LRRGQILWFRGLNRIQTQIDVINTFQTGASFKGVLRR |
|                 | *****.*:::*.:. . . .                  |

**Figure S17. The Pfam domain broken in the splice variants of *ATP2B1* and *ATP2B4***

A. Seed alignment for Pfam domain PF12424 (Plasma membrane calcium transporter ATPase C terminal). B. Structure resolved for this domain, from PDB structure 2KNE, chain B, which is a single helix, bound to calmodulin. C. The alignment between the two homologous isoforms of *ATP2B1* identified in the experiments. The blue and red arrows show where the Pfam seed alignment begins (blue) and where the conserved section of the Pfam domain ends (red). The Pfam domain is highly conserved over the first part of the alignment (the part of the alignment that coincides with the crystallised helix structure), but has little conservation at the C-terminal end. The (distant) homology detected for the *ATP2B1* isoforms (and all other members of this family) is clear up to the residue indicated with the red arrow, but it not conserved after and therefore the splice event would break the domain. However, the evidence from the PDB structure (and the lack of conservation in the Pfam seed alignment itself) suggests that the Pfam alignment should not be extended beyond the red arrow. In fact the residues before the first N-terminal residue of PF12424 are just as conserved as the residues between the ed and blue arrows, suggesting that perhaps the plasma membrane calcium transporter ATPase C terminal domain should also be extended towards the N-terminal end.
